# Supplementary material for: Promising Acyclovir and its derivatives to inhibit the protease of SARS-CoV-2: Molecular Docking and Molecular Dynamics simulations
Source: Research Square preprint supplement (doi:10.21203/rs.3.rs-94864/v1), 2020-10-21
Supplement: Supplementary file 1 [file aca9f68a2b82fc4d57d663ec.docx]

**Table 2** Binding energy for the formation of complex between the compounds and the protease of SARS-CoV-2, against COVID-19

| **Name of the compound** | **Docked pose** | **Π Interactions** | | **Hydrogen Bond Interactions** | | **Binding affinity (kcal/mol)** |
| --- | --- | --- | --- | --- | --- | --- |
| **Amino acids** | **Distance (Å)** | **Amino acids** | **Distance (Å)** |
| Acyclovir, **CMPD1** | 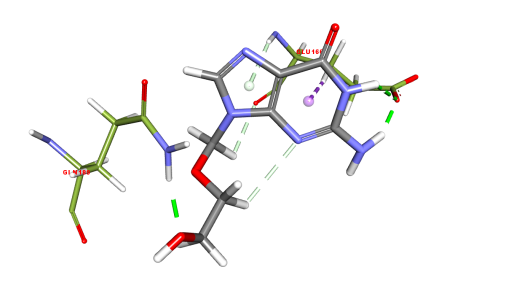 | GLU_166 | 3.93 | GLU_166  GLN_189 | 5.07, 4.27, 3.90, 3.77,  3.58 | -3.92 |
| Ganciclovir, **CMPD2** | 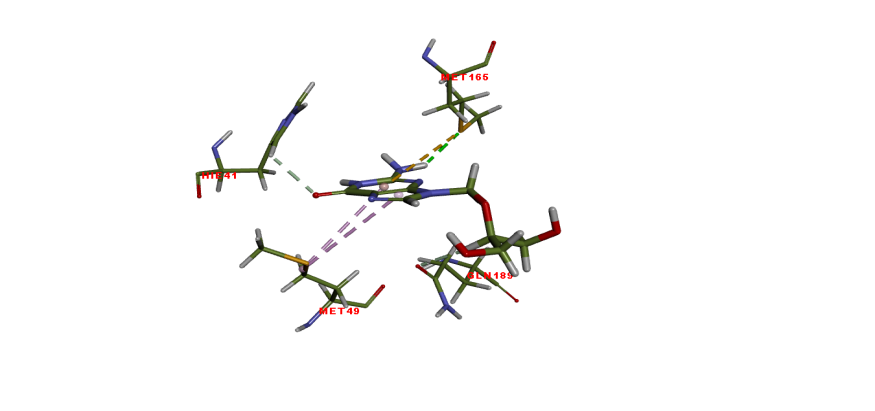 | MET_165  MET_49 | 7.03  5.78, 4.36 | MET_165  GLN_189  HIE_41 | 3.77,  4.38,  3.53, | -3.74 |
| **CMPD3** | 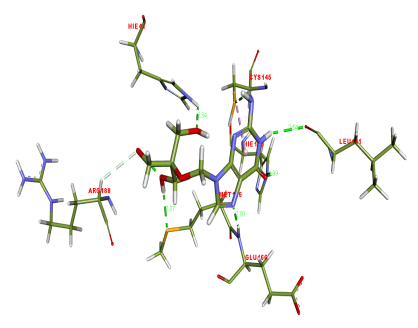 | CYS_145 | 5.63 | CYS_145  LEU_141  GLU_166  HIE_163  MET_165  ARG_188  HIE_41 | 3.93,  6.36,  4.29,  5.44,  3.41,  5.93,  4.94 | -4.34 |
